# Supplementary material for: Covalent Organic Framework (C6N6) as a Drug Delivery Platform for Fluorouracil to Treat Cancerous Cells: A DFT Study
Source: MDPI journal article supplement (doi:10.3390/ma15217425), 2022-10-22
Supplement: s1 [file s1]

# Covalent Organic Framework (C<sub>6</sub>N<sub>6</sub>) as a Drug Delivery Platform for Fluorouracil to Treat Cancerous Cells: A DFT Study

Mohammed A. Alkhalifah <sup>1,\*</sup>, Muhammad Yar <sup>2</sup>, Imene Bayach <sup>1</sup>, Nadeem S. Sheikh <sup>3</sup> and Khurshid Ayub <sup>2,\*</sup>

<sup>1</sup> Department of Chemistry, College of Science, King Faisal University, Al-Ahsa 31982, Saudi Arabia

<sup>2</sup> Department of Chemistry, COMSATS University Islamabad, Abbottabad Campus, Abbottabad 22060, KPK, Pakistan

<sup>3</sup> Chemical Sciences, Faculty of Science, Universiti Brunei Darussalam, Jalan Tungku Link, Gadong BE1410, Brunei

\* Correspondence: malkalifah@kfu.edu.sa (M.A.A.); khurshid@cuiatd.edu.pk (K.A.)

**Table S1.** Adsorption energies of least stable complexes of drug@C<sub>6</sub>N<sub>6</sub>.

| Drug@C <sub>6</sub> N <sub>6</sub> | Adsorption energies |
|------------------------------------|---------------------|
| A                                  | -28.13              |
| B                                  | -23.02              |
| C                                  | -28.10              |
| D                                  | -26.55              |
| E                                  | -19.35              |
| F                                  | -19.35              |

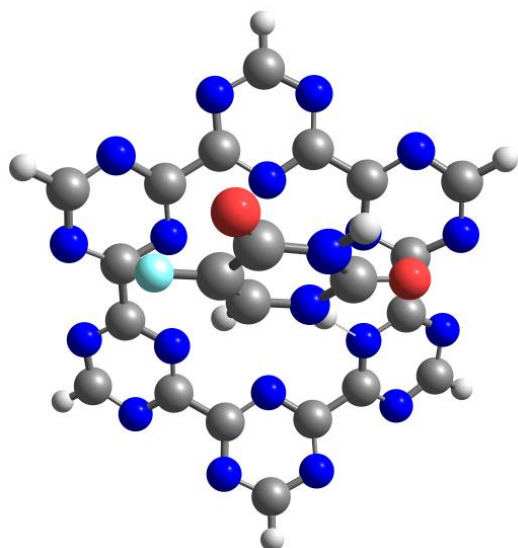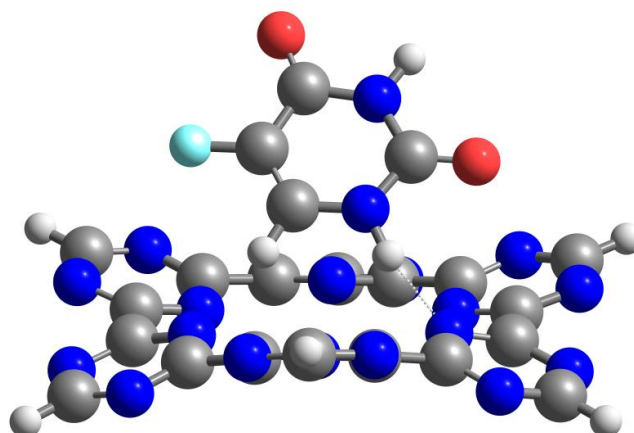

A

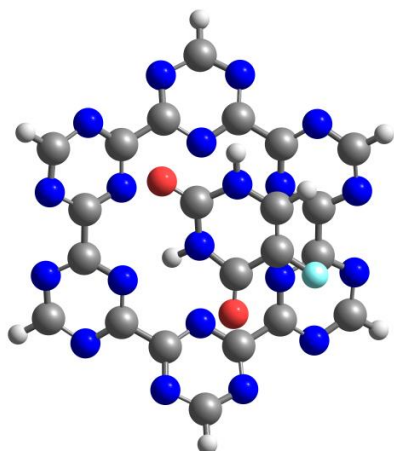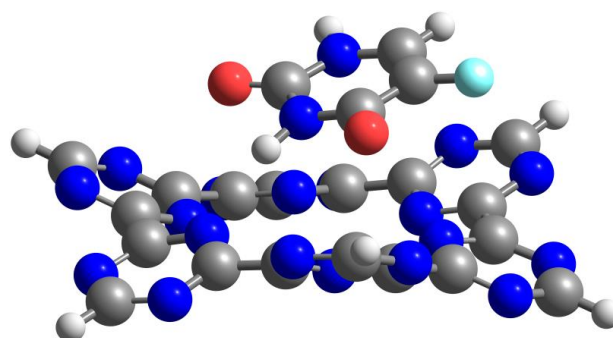

B

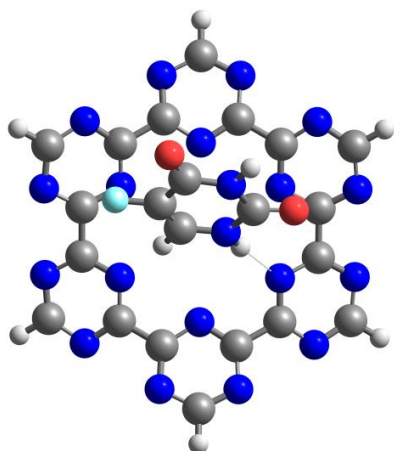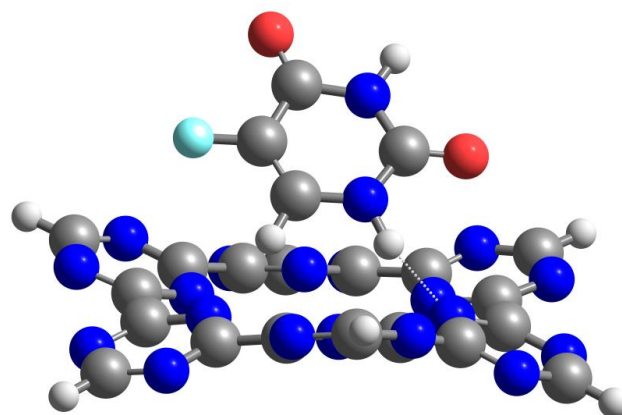

C

---

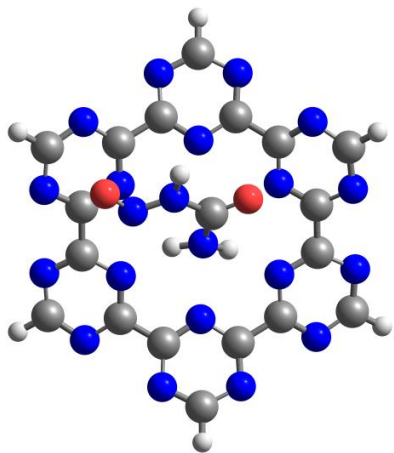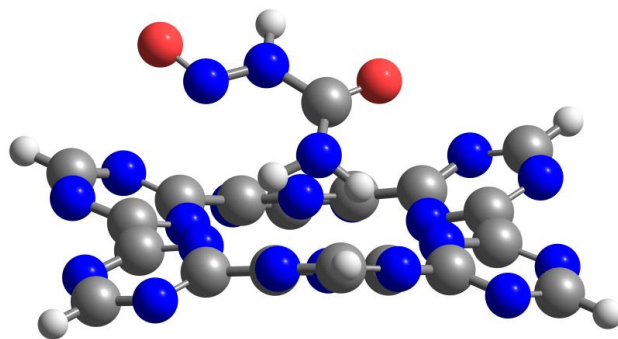

D

---

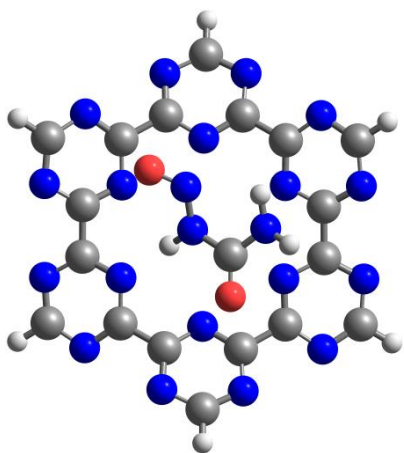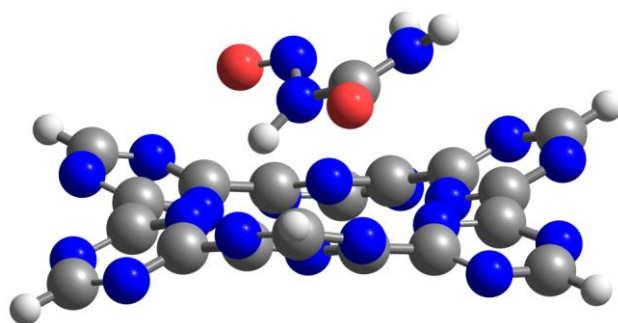

E

---

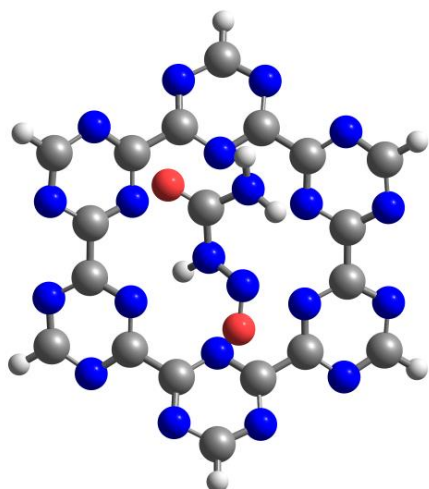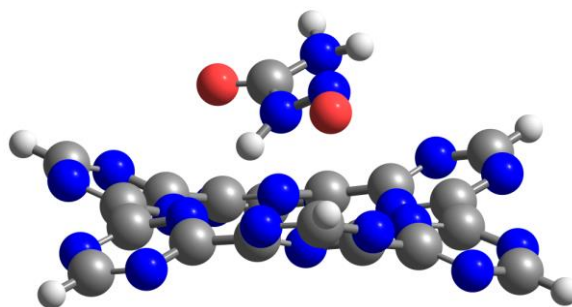

F

---

**Figure S1.** Top and side views of least stable complexes of FU@C<sub>6</sub>N<sub>6</sub> (A–C) and NU@C<sub>6</sub>N<sub>6</sub> (D–F).
